# Supplementary material
Source: PubMed Central journal article supplement (PMC4381653)
Supplement: NIHMS674029-supplement-Figures_and_Tables.pdf [file NIHMS674029-supplement-Figures_and_Tables.pdf]

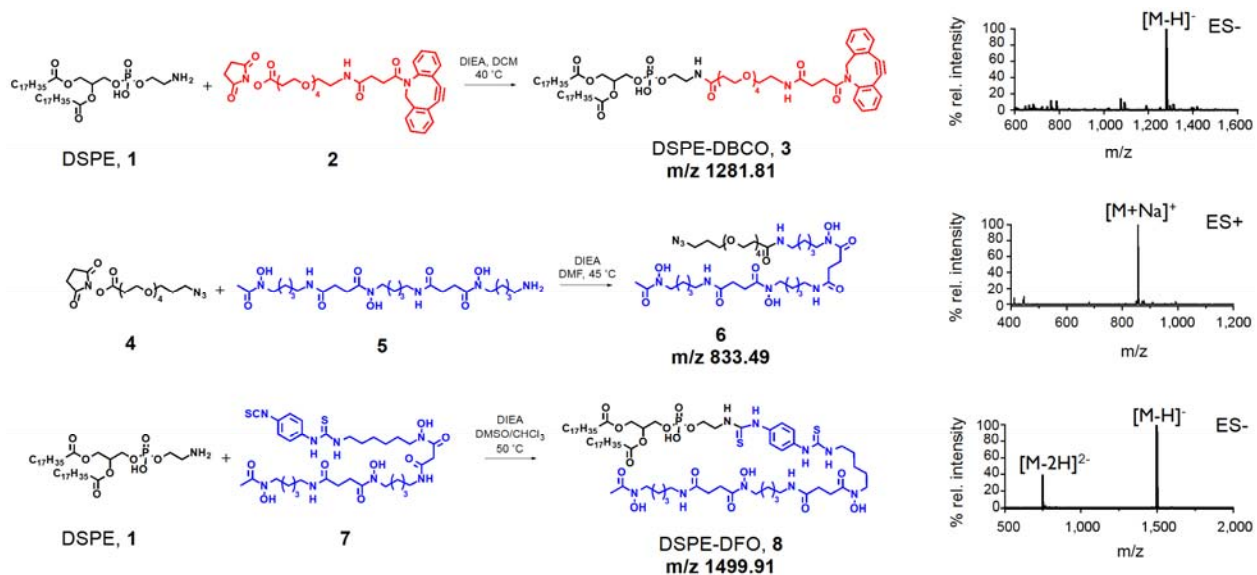

**Supplemental Figure 1.** Synthesis of building blocks **3**, **6**, and **8**, and corresponding mass spectra.

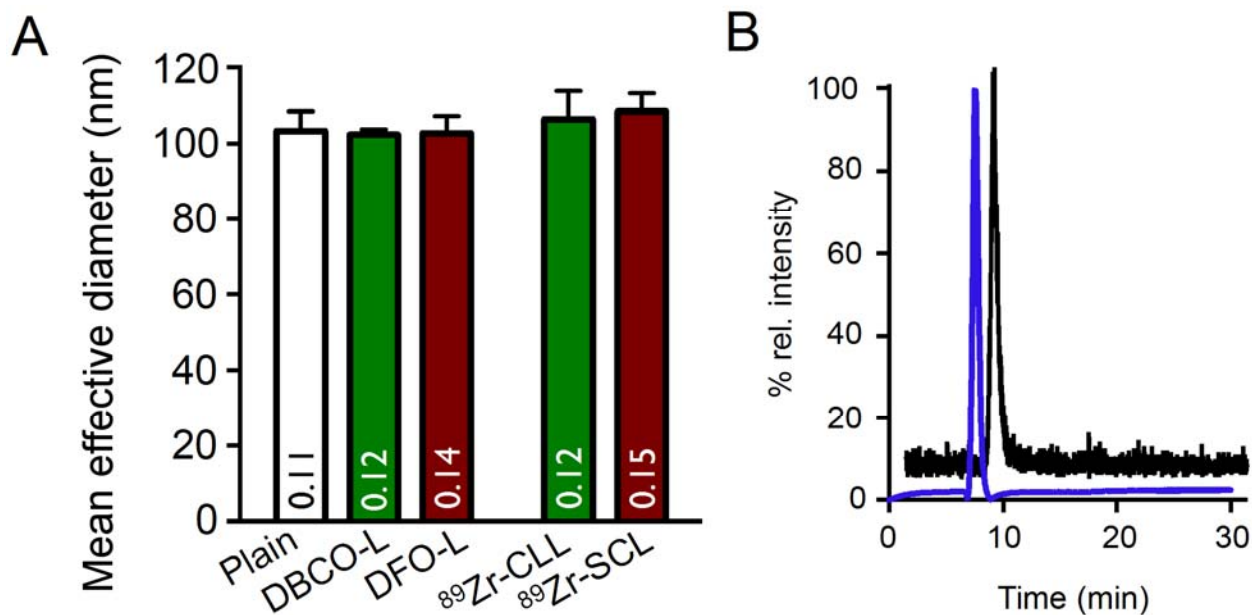

**Supplemental Figure 2.** (A) Sizes (expressed as mean effective diameter) and polydispersity values of different liposomes described in the present work. (B) Size-exclusion chromatogram showing absorption at 650 nm (front) and radioactive trace (back) of sample of DiIC@<sup>89</sup>Zr-SCL.

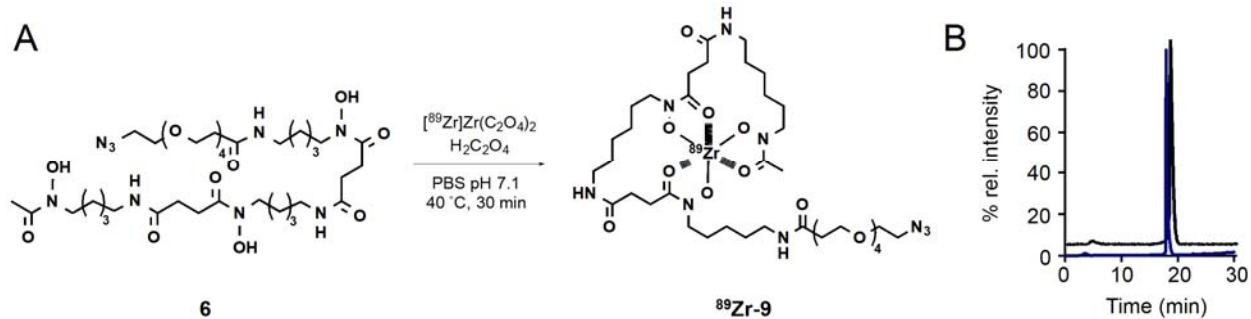

**Supplemental Figure 3.** (A) Radiosynthesis of  $^{89}\text{Zr}$ -9. (B) HPLC chromatogram showing ultraviolet (absorption at 220 nm, front) and radioactive (back) traces of mixture of  $^{89}\text{Zr}$ -9 and reference compound 9, demonstrating coelution.

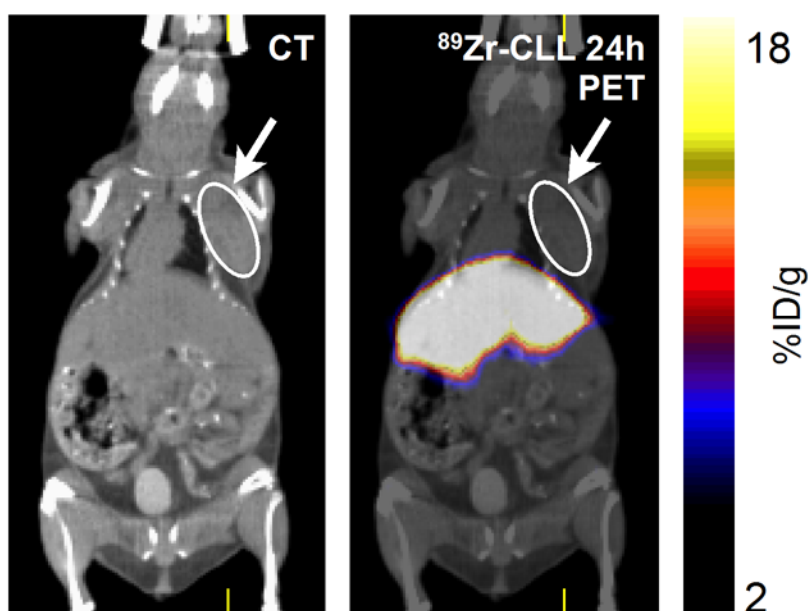

**Supplemental Figure 4.** PET/CT imaging of  $^{89}\text{Zr}$ -CLL showing CT only (left) and PET/CT fusion (right) at 24 h after injection. Arrow indicates location of tumor.

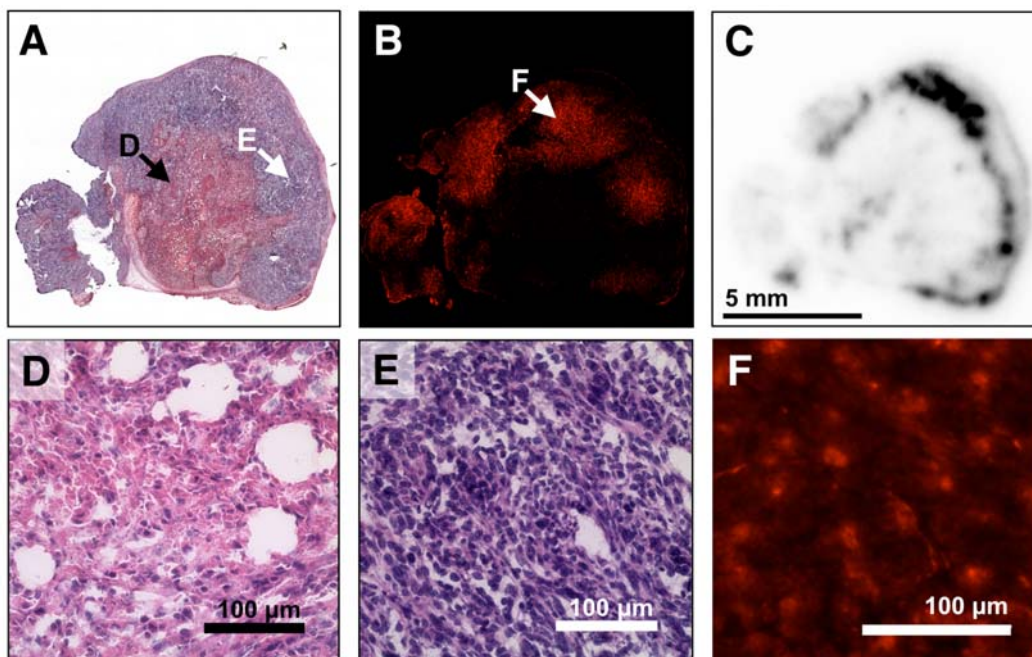

**Supplemental Figure 5.** Ex vivo analysis of tumor section at 24 h after administration of  $^{89}\text{Zr}$ -SCL. (A) Hematoxylin and eosin staining (expanded regions shown in D and E). (B) IBA1 immunohistology section (expanded region shown in F). (C) Autoradiography.

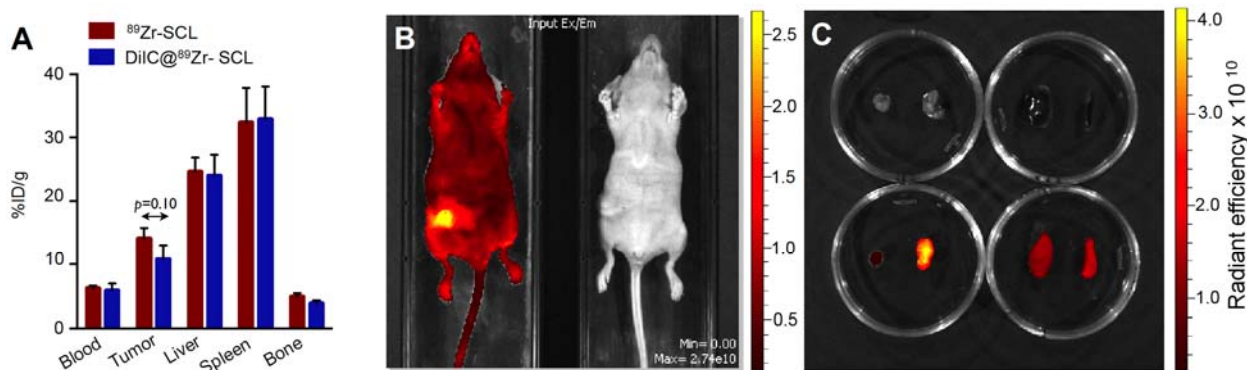

**Supplemental Figure 6.** (A) PET-quantified radioactivity distribution in selected tissues 24 h after administration of  $^{89}\text{Zr}$ -SCL (left) and DiIC@ $^{89}\text{Zr}$ -SCL (right), expressed as %ID/g  $\pm$  SD ( $n \geq 3$ ). (B) Whole-body near-infrared fluorescence imaging ( $\lambda_{\text{Ex}} = 650 \text{ nm}/\lambda_{\text{Em}} = 670 \text{ nm}$ ) at 24 h after administration of DiIC@ $^{89}\text{Zr}$ -SCL (left) and  $^{89}\text{Zr}$ -SCL (right), which was used as control. (C) Near-infrared fluorescence imaging ( $\lambda_{\text{Ex}} = 650 \text{ nm}/\lambda_{\text{Em}} = 670 \text{ nm}$ ) of excised specimens of muscle, tumor, liver, and spleen (from left to right) collected at 24 h after administration of  $^{89}\text{Zr}$ -SCL (top 2 dishes) and DiIC@ $^{89}\text{Zr}$ -SCL (bottom 2 dishes).

**SUPPLEMENTAL TABLE 1.** Tissue Radioactivity Distribution of <sup>89</sup>Zr-SCL in Female NCr Nude Mice Bearing 4T1 Breast Xenografts (*n* ≥ 3 for Each Time Point)

| Tissue          | 2 h   |      | 24 h  |      | 48 h  |      |
|-----------------|-------|------|-------|------|-------|------|
|                 | %ID/g | SD   | %ID/g | SD   | %ID/g | SD   |
| Blood           | 36.9  | 1.65 | 6.81  | 0.29 | 1.89  | 0.76 |
| Tumor           | 3.29  | 1.11 | 13.7  | 1.84 | 7.88  | 1.16 |
| Heart           | 0.97  | 0.19 | 1.14  | 0.14 | 1.26  | 0.07 |
| Lungs           | 1.12  | 0.35 | 1.05  | 0.22 | 1.03  | 0.15 |
| Stomach         | 1.30  | 0.51 | 1.57  | 0.39 | 0.76  | 0.07 |
| Small intestine | 2.62  | 1.07 | 2.72  | 0.49 | 1.41  | 0.10 |
| Large intestine | 1.95  | 0.97 | 1.56  | 0.23 | 0.93  | 0.05 |
| Spleen          | 33.5  | 4.72 | 58.9  | 12.2 | 36.0  | 7.03 |
| Kidneys         | 2.64  | 0.50 | 3.36  | 0.43 | 3.19  | 0.21 |
| Liver           | 17.1  | 6.22 | 24.7  | 4.59 | 22.2  | 6.15 |
| Muscle          | 0.85  | 0.01 | 1.13  | 0.09 | 1.77  | 0.78 |
| Bone            | 1.50  | 0.32 | 3.78  | 0.08 | 5.09  | 1.32 |

**SUPPLEMENTAL TABLE 2.** Tissue Radioactivity Distribution of <sup>89</sup>Zr-CLL in Female NCr Nude Mice Bearing 4T1 Breast Xenografts (*n* ≥ 3 for Each Time Point)

| Tissue          | 2 h   |      | 24 h  |      | 48 h  |      |
|-----------------|-------|------|-------|------|-------|------|
|                 | %ID/g | SD   | %ID/g | SD   | %ID/g | SD   |
| Blood           | 5.53  | 0.35 | 1.04  | 0.20 | 0.68  | 0.24 |
| Tumor           | 1.23  | 0.26 | 2.00  | 0.15 | 1.73  | 0.19 |
| Heart           | 0.80  | 0.06 | 0.82  | 0.23 | 0.67  | 0.26 |
| Lungs           | 1.19  | 0.06 | 0.72  | 0.16 | 0.71  | 0.28 |
| Stomach         | 0.59  | 0.15 | 0.42  | 0.05 | 0.40  | 0.10 |
| Small intestine | 0.51  | 0.09 | 0.27  | 0.04 | 0.28  | 0.05 |
| Large intestine | 0.52  | 0.12 | 0.27  | 0.03 | 0.22  | 0.10 |
| Spleen          | 54.3  | 14.3 | 51.4  | 6.14 | 23.3  | 7.29 |
| Kidneys         | 2.40  | 0.65 | 2.75  | 0.17 | 3.24  | 0.40 |
| Liver           | 49.7  | 13.0 | 46.7  | 5.49 | 40.1  | 8.34 |
| Muscle          | 1.42  | 0.24 | 1.19  | 0.35 | 0.99  | 0.47 |
| Bone            | 2.59  | 0.92 | 5.53  | 1.57 | 6.16  | 1.83 |
